# Supplementary material
Source: Research Square preprint supplement (doi:10.21203/rs.3.rs-9088244/v1)
Supplement: Supplementary file 1 [file e5e4b659a412ed65726e05e6.docx]

**Benchmarking Deep Learning Architectures for Forest Monitoring and Management: A Systematic Review**

**Supplementary Materials**

**
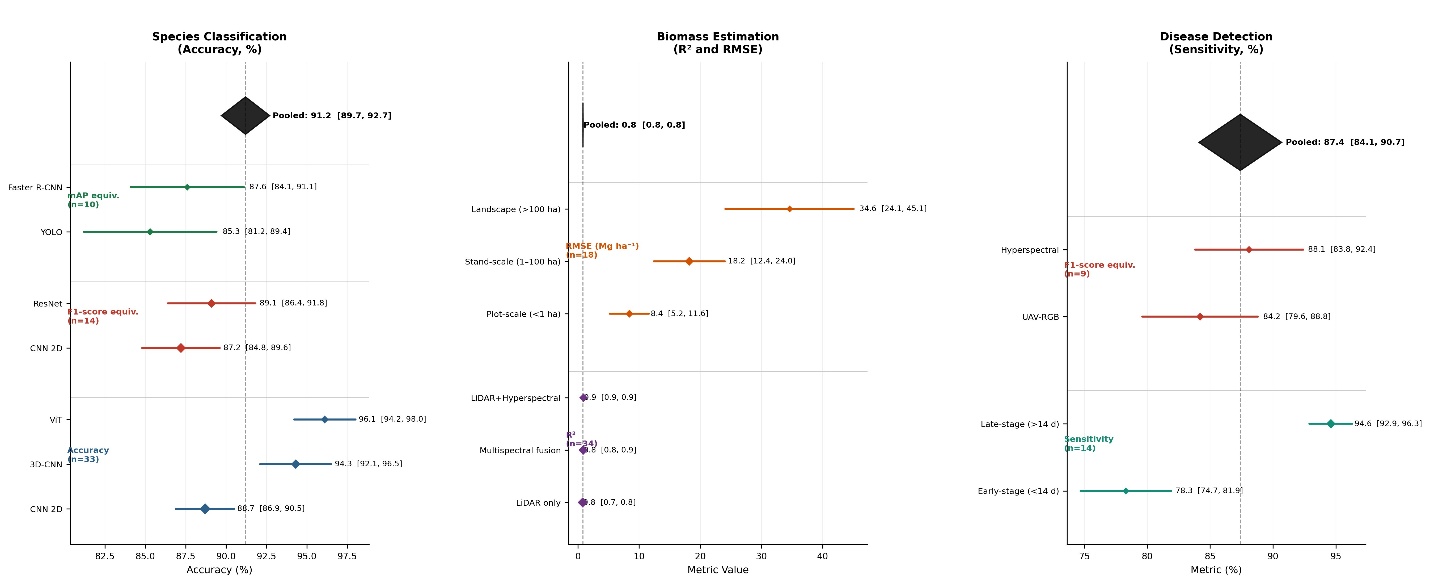
**

**Figure S1.** Stratified meta-analysis forest plots by primary metric type. Diamond symbols represent pooled estimates with 95% CI; circle size proportional to sample size

**
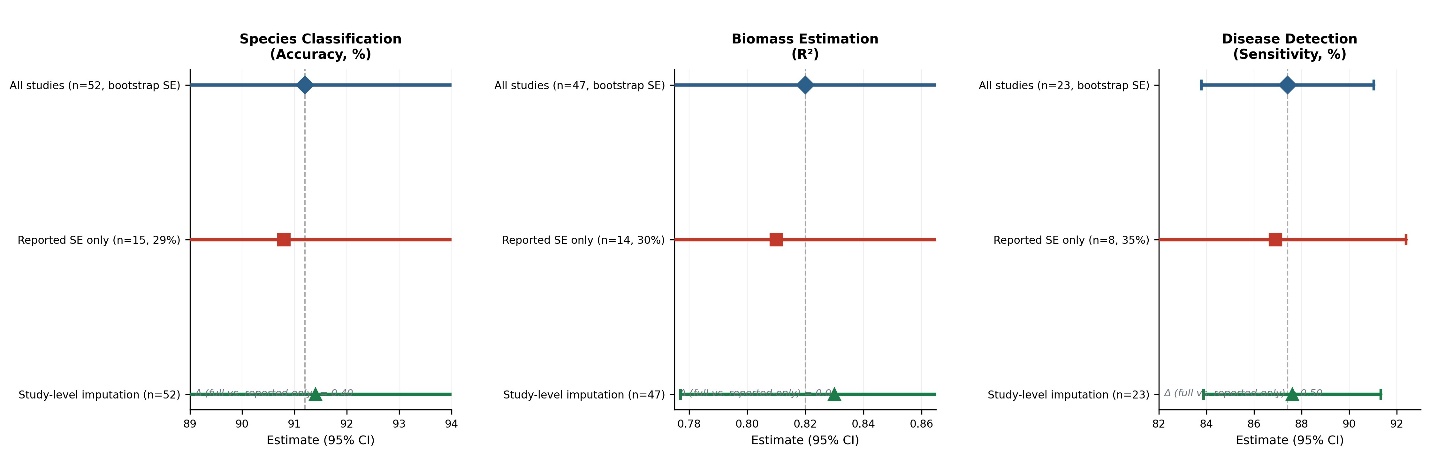
**

**Figure S2.** Sensitivity analysis: impact of variance imputation method on pooled estimates. Diamonds = all studies (bootstrap *SE*); squares = reported *SE* only; triangles = study-level imputation


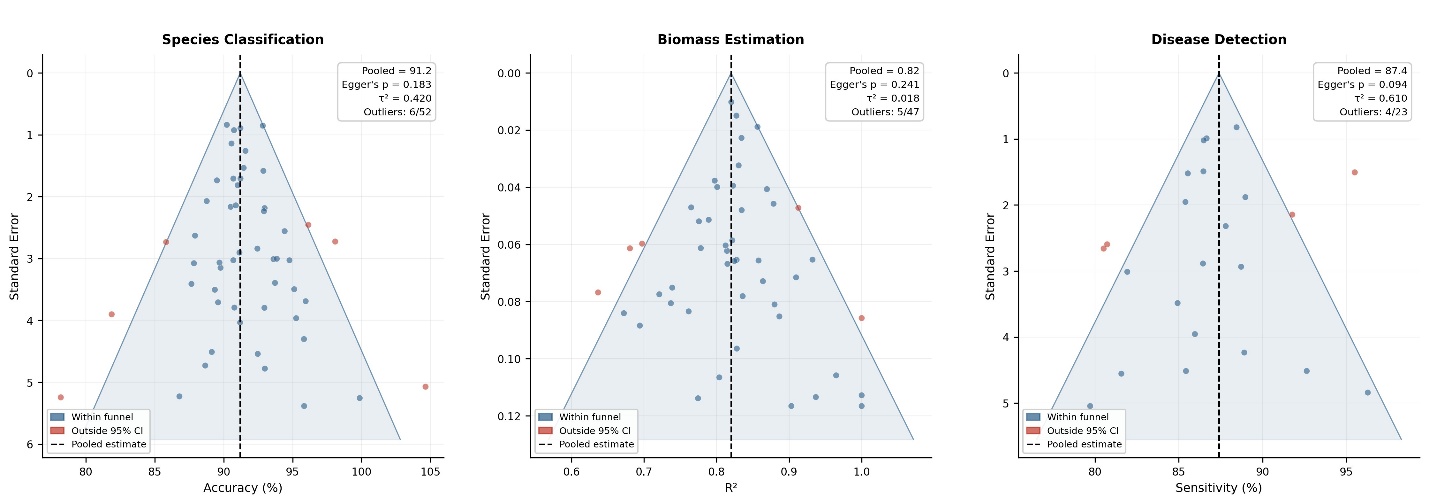


**Figure S3.** Funnel plots for assessment of publication bias across three application domains. Symmetric funnels indicate no substantial small-study bias. Egger's test *p*-values shown.


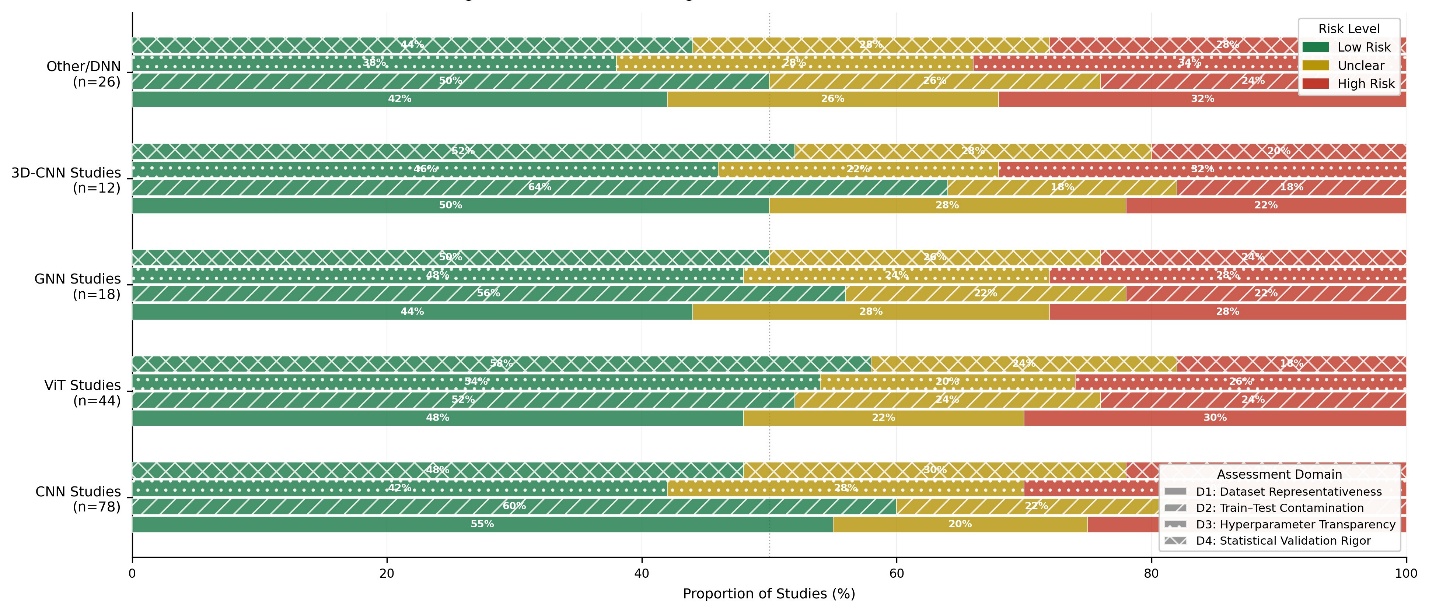


**Figure S4.** Modified QUADAS-2 risk-of-bias summary by architecture group. Hatching encodes domain (see legend). Bars show % of studies within each risk level.


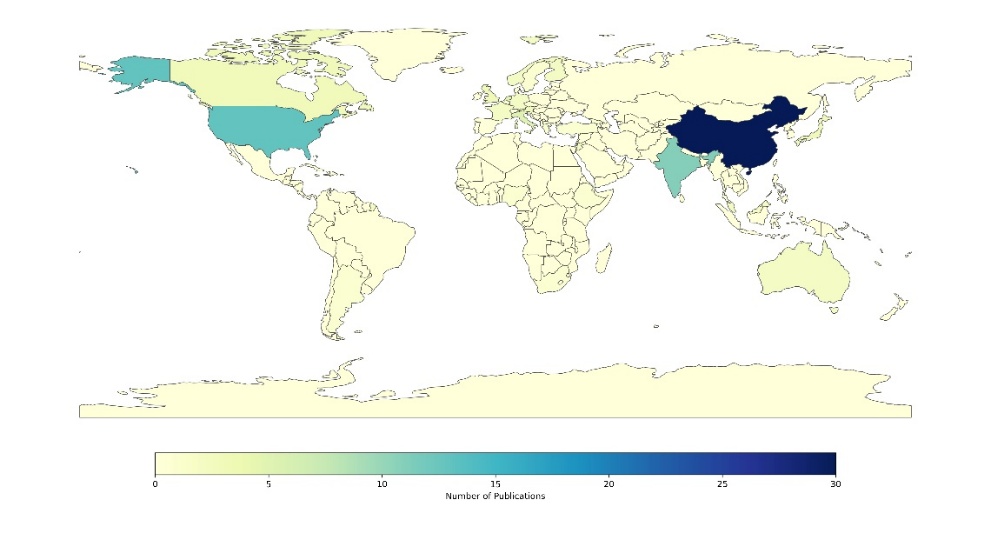


**Figure S5.** Publication trends in terms of global distribution.


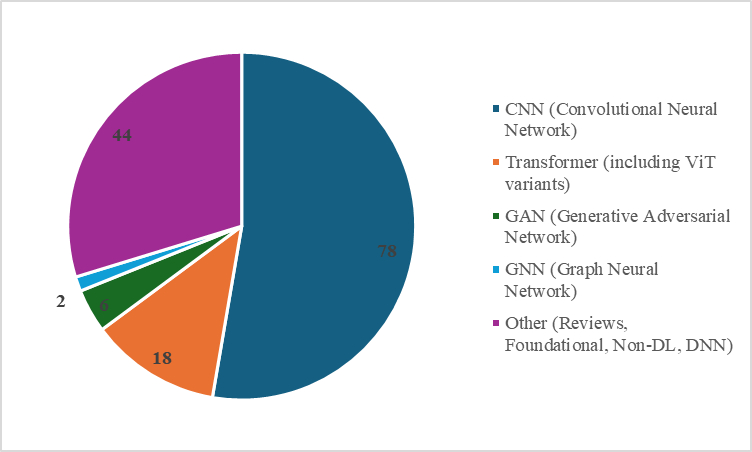


**Figure S6.** Pie chart showing distribution of deep learning architectures used in the reviewed studies.

**
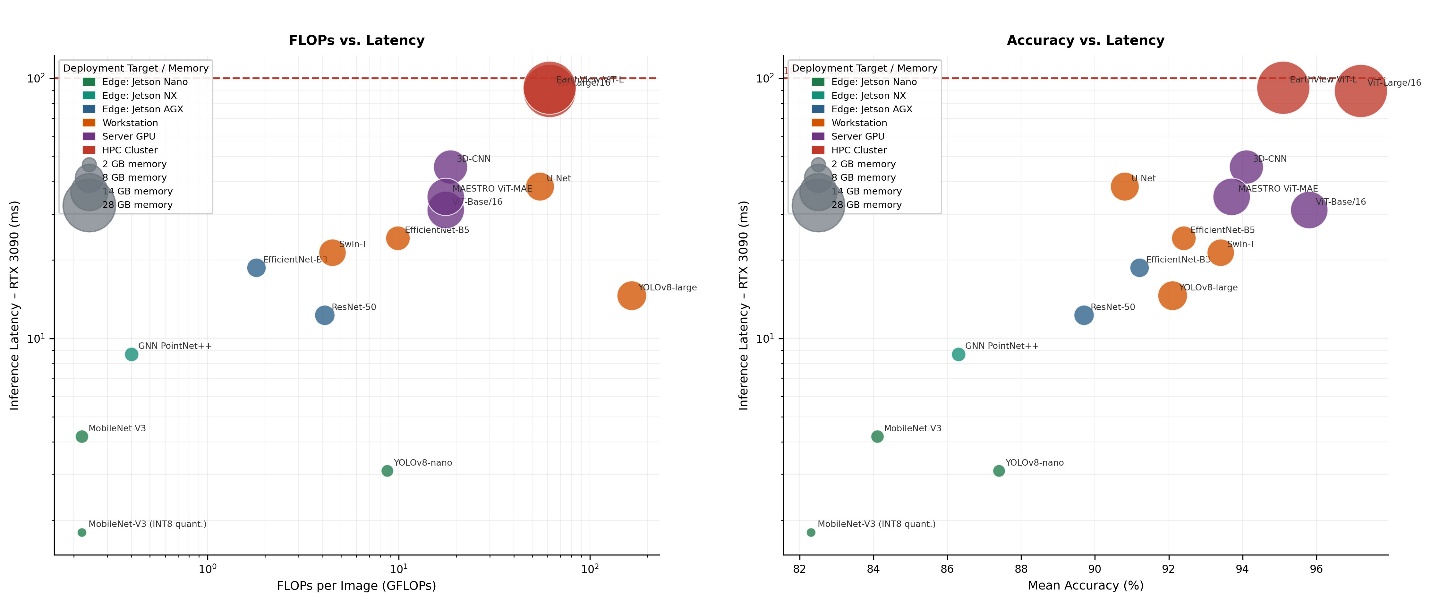
**

**Figure S7.** Computational efficiency trade-off: FLOPs, latency, memory, and deployment target. Bubble area proportional to peak GPU memory (GB). Red dashed line = 100 ms real-time threshold.


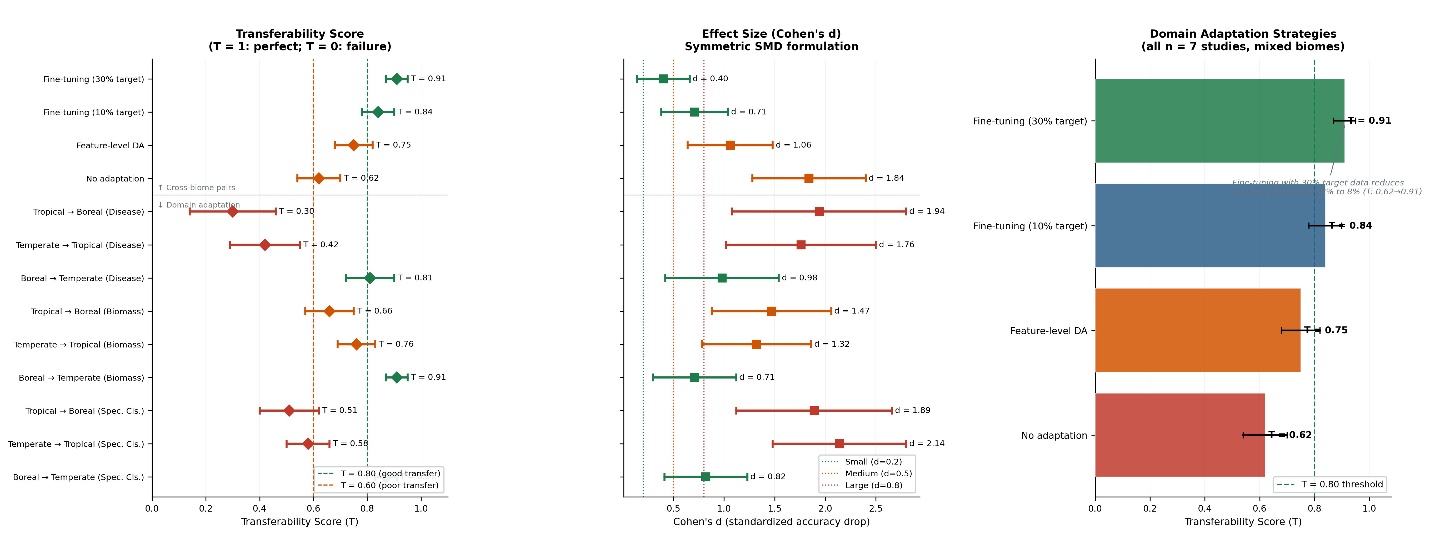


**Figure S8.** Cross-biome transferability scores and effect sizes with 95% confidence intervals. Left: T-score; centre: standardized mean difference (Cohen's *d*); right: domain adaptation strategies.
